# Supplementary material for: Designing photothermal catalytic systems in multi-component MOFs for enhanced conversion of carbon dioxide
Source: Royal Society of Chemistry journal article supplement (doi:10.1039/d4cc03203a), 2024-01-01
Supplement: d4cc03203a1.pdf [file d4cc03203a1.pdf]

## Supporting information

# Designing Photothermal Catalytic Systems in Multi-Component MOFs for Enhanced Conversion of Carbon Dioxide

*Yulun Wu,<sup>a</sup> Lei Gao<sup>a</sup>, Xiao-Cheng Zhou,<sup>a</sup> Xiang Yu,<sup>a</sup> Ya-Ru Meng,<sup>b</sup> Jing-Lin Zuo,<sup>a</sup> Jian Su,<sup>\*b</sup> and Shuai Yuan<sup>\*a</sup>*

## **Experimental Methods**

### **General Methods**

All the reagents and solvents were commercially available and used as received. Deuterated solvents were purchased from Cambridge Isotope Laboratory (Andover, MA). Single-crystal X ray diffraction intensity data for Zr-TTF, Zr-TTF-L<sub>1</sub> and Zr-TTF-L<sub>1</sub>-L<sub>2</sub> were collected on a Bruker D8 Venture diffractometer. <sup>1</sup>H-NMR were recorded on a Bruker Avance III 400 NMR spectrometer. FT-IR spectra were recorded on a Vector 27 Bruker Spectrophotometer by transmission through KBr pellets containing the ground crystals in the range 4000 - 400 cm<sup>-1</sup>. Gas adsorption/desorption isotherms were measured using a Micromeritics ASAP 2020 system, and a BSD-PS4 gas adsorption analyzer. TGA data were obtained on a TGA 4000 thermal analysis system at a heating rate of 10 °C min<sup>-1</sup> under air atmosphere. The powder X-ray diffraction (PXRD) patterns were collected at room temperature using a scan speed of 0.1 s/step on a Bruker Advance D8 (40 kV, 40 mA) diffractometer equipped with Cu radiation. Simulated PXRD patterns were generated from single crystal data using Mercury 3.0. UV-Vis absorbance spectra were recorded on Shimadzu UV-3600. ESI-MS data were performed on a LCQ Fleet MS system. Electron paramagnetic resonance (EPR) spectra were obtained by using a Bruker EMX-10/12 variable temperature apparatus at 298 K. An 808 nm laser source were purchased from Shanghai Connet Fiber Optics.

## Synthesis

### Synthesis of compound Me-H<sub>4</sub>TTFTB

Me-H<sub>4</sub>TTFTB were prepared adopting the previously reported procedure [1]. Me-H<sub>4</sub>TTFTB in red solid was obtained with a yield of 36%. <sup>1</sup>H-NMR (400 MHz, d<sub>6</sub>-DMSO) δ 13.06 (br, 4H), δ 7.73 (s, 4H), δ 7.66-7.64 (d, 4H), δ 7.40-7.39 (d, 4H), δ 2.32 (s, 12H); ESI-MS m/z calculated for C<sub>38</sub>H<sub>28</sub>O<sub>8</sub>S<sub>4</sub> [M-H] 739.08, found 739.07. FT-IR (KBr pellet, cm<sup>-1</sup>): 2971 w, 2532 w, 1692 vs., 1660 s, 1563 m, 1417 m, 1288 vs., 1257 s, 1190 s, 1125 s, 1048 m, 903 m, 839 m, 758 s, 559 m, 445 m.

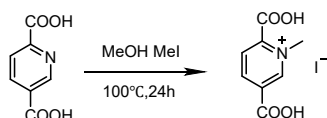

### Scheme S1. Synthesis of 2,5-Dicarboxy-1-methylpyridinium (L<sub>1</sub>)

**Synthesis of 2,5-Dicarboxy-1-methylpyridinium:** 2,5-Pyridinedicarboxylic acid (1.0 g, 6 mmol) and iodomethane (1.7 g, 12 mmol) were added into 7 ml Methanol. The mixture was added to a 35 ml Pyrex tube and heated at 100 °C for 24 hours to obtain a brownish-yellow solution, after cooling to room temperature, 25 ml of ethyl acetate was added, and a yellow precipitate was precipitated. Washed with ethyl acetate and ether for three times, dried under vacuum at 45 °C to obtain bright yellow powder (1.48 g, 84%). <sup>1</sup>H-NMR (400 MHz, d<sub>6</sub>-DMSO) δ 13.78 (s, 1H), δ 9.16-9.14 (d, 1H), δ 8.47-8.42 (m, 1H), δ 8.19-8.14 (d, 1H), δ 3.91 (s, 3H) ppm.

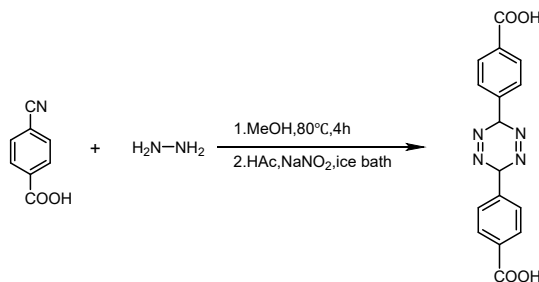

### Scheme S2. Synthesis of 4,4'-(1,2,4,5-tetrazine-3,6-diyl) dibenzoic acid (L<sub>2</sub>).

**Synthesis of 4,4'-(1,2,4,5-tetrazine-3,6-diyl) dibenzoic acid:** A hydrazine solution 35 wt.% in H<sub>2</sub>O (40 ml) was added dropwise to 4-cyanobenzoic acid (5.89 g, 40 mmol). Subsequently, the mixture was heated at 80 °C for 4 h. After cooling to room temperature, the formed yellowish precipitate was filtered off and washed with small volumes of MeOH (100 mL). To remove the starting material, the solid was stirred in MeOH for a few minutes, and filtered off the yellowish solid was suspended in acetic acid (120 mL) and oxidized by slow addition an aqueous solution of sodium nitrite (16.56 g in 60 mL H<sub>2</sub>O) while in an ice bath and subsequently stirred for 4 h. The purple solid in the suspension was collected by filtration, washed with water and finally dried in an oven at 90 °C to afford 3.49 g (yield ~54%) of 4,4'-(1,2,4,5-tetrazine-3,6-diyl) dibenzoic acid. <sup>1</sup>H-NMR (400 MHz DMSO-d<sub>6</sub>) δ 8.24 (d, 4H); δ 8.67 (d, 4H). C<sub>16</sub>H<sub>10</sub>N<sub>4</sub>O<sub>4</sub>, M.W. 322.28.

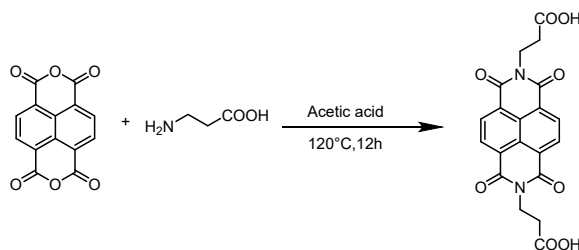

### Scheme S3. Synthesis of 3,3'-(1,3,6,8-tetraoxo-1,3,6,8-tetrahydrobenzo[lmn][3,8] phenanthroline-2,7-diyl)

dipropionic acid (**NDI-P**).

**Synthesis of 3,3'-(1,3,6,8-tetraoxo-1,3,6,8-tetrahydrobenzo[lmn][3,8] phenanthroline-2,7-diyl) dipropionic acid:** 1,4,5,8-naphthalenetetracarboxylic acid anhydride (1.55 g, 5.81 mmol),  $\beta$ -alanine (1.29 g, 14.41 mmol) were added into acetic acid (40 ml). The reaction mixture was then stirred and heated at 110 °C for 12 h under nitrogen. After the reaction being allowed to cool to room temperature ice water (50 ml) was added into the mixture. The mixture was filtered and the yellow precipitates were obtained to be recrystallized by ethanol. This yield NDI-P as a faint yellow solid (2.1 g, 90%). <sup>1</sup>H-NMR (DMSO-d<sub>6</sub>, 400 MHz, ppm):  $\delta$  12.43 (br. s, 2H), 8.63 (s, 4H), 4.28-4.24 (t, J = 7.6 Hz, 2H), 2.65-2.61 (t, J = 7.6 Hz, 2H). C<sub>20</sub>H<sub>13</sub>N<sub>2</sub>O<sub>8</sub> M.W. 409.067; found: 409.067.

**Synthesis of Zr<sub>6</sub>(Me-TTFTB)<sub>1.5</sub>O<sub>4</sub>(OH)<sub>10</sub>(H<sub>2</sub>O)<sub>6</sub>(Zr-TTF):** To a solution of Me-H<sub>4</sub>TTFTB (0.010 g, 0.013 mmol), ZrCl<sub>4</sub> (0.030 g, 0.129 mmol) and benzoic acid (0.6 g, 4.91 mmol) in 3 mL DMF was added 0.1 mL water. The mixture was capped and heated to 120 °C for 72 h, then cooled to room temperature at a rate of 5 °C / h<sup>-1</sup>. Orange-yellow cubic crystals (0.007 g) of Zr-TTF were obtained by filtration and washed with DMF and acetone three times. Yield 25.5% (based on Me-H<sub>4</sub>TTFTB).

**Synthesis of Zr-TTF-L<sub>1</sub>:** Zr-TTF (100mg), L<sub>1</sub> (200 mg) and DMF (40 mL) were charged in a Pyrex vial. The mixture was heated in a 75 °C oven for 24 h. The crystals of Zr-TTF-L<sub>1</sub> were collected by filtration and washed with fresh DMF 3 times. (101 mg, yield: 96%).

**Synthesis of Zr-TTF-L<sub>1</sub>-L<sub>2</sub>:** Zr-TTF-L<sub>1</sub> (100 mg), L<sub>2</sub> (50 mg) and DMF (100 mL) were charged in a Pyrex vial. The mixture was heated in a 75 °C oven for 24 h. The crystals of Zr-TTF-L<sub>1</sub>-L<sub>2</sub> were collected by filtration and washed with fresh DMF 3 times. (110 mg, yield: 98%).

**Synthesis of Zr-TTF-L<sub>1</sub>-L<sub>3</sub>:** Zr-TTF-L<sub>1</sub> (100 mg), L<sub>3</sub> (200 mg) and DMF (40 mL) were charged in a Pyrex vial. The mixture was heated in a 75 °C oven for 24 h. The crystals of Zr-TTF-L<sub>1</sub>-L<sub>3</sub> were collected by filtration and washed with fresh DMF 3 times. (102 mg, yield: 92%).

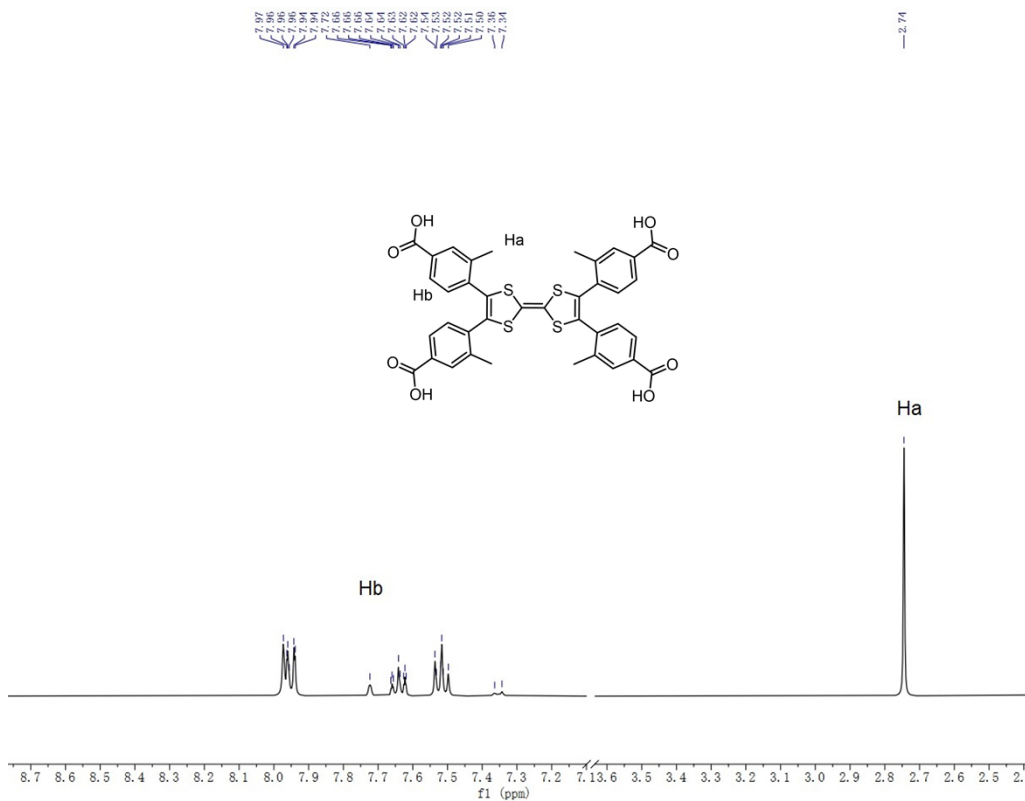

Fig. S1. <sup>1</sup>H-NMR of Zr-TTF.

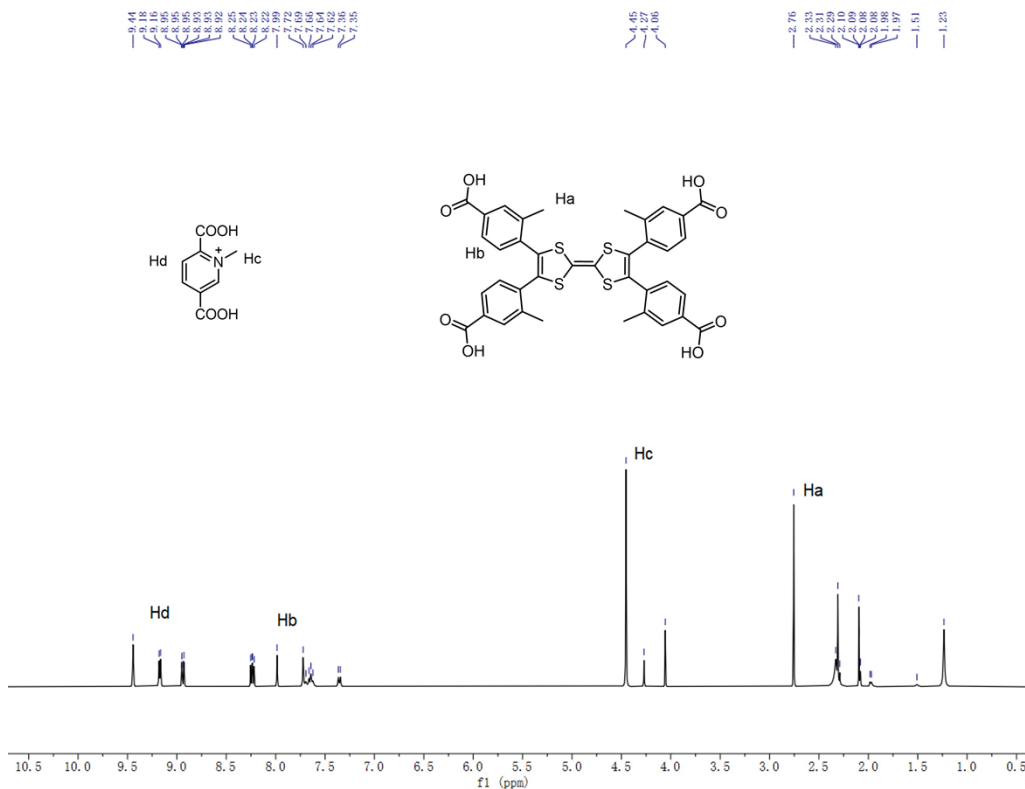

Fig. S2. <sup>1</sup>H-NMR of Zr-TTF-L<sub>1</sub>.

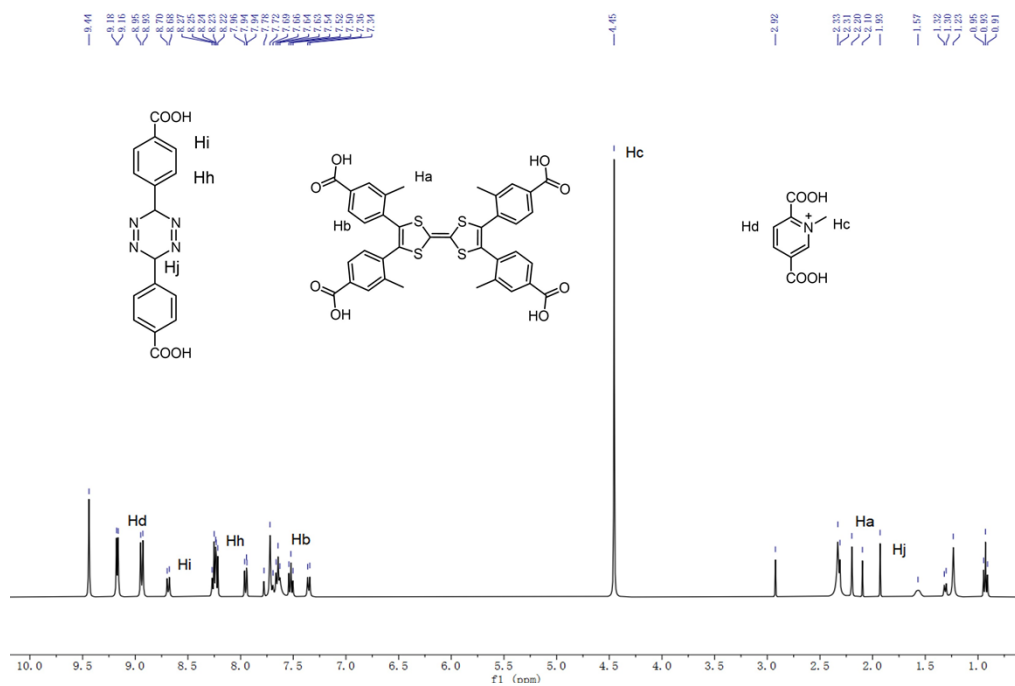

Fig. S3. <sup>1</sup>H-NMR of Zr-TTF-L<sub>1</sub>-L<sub>2</sub>.

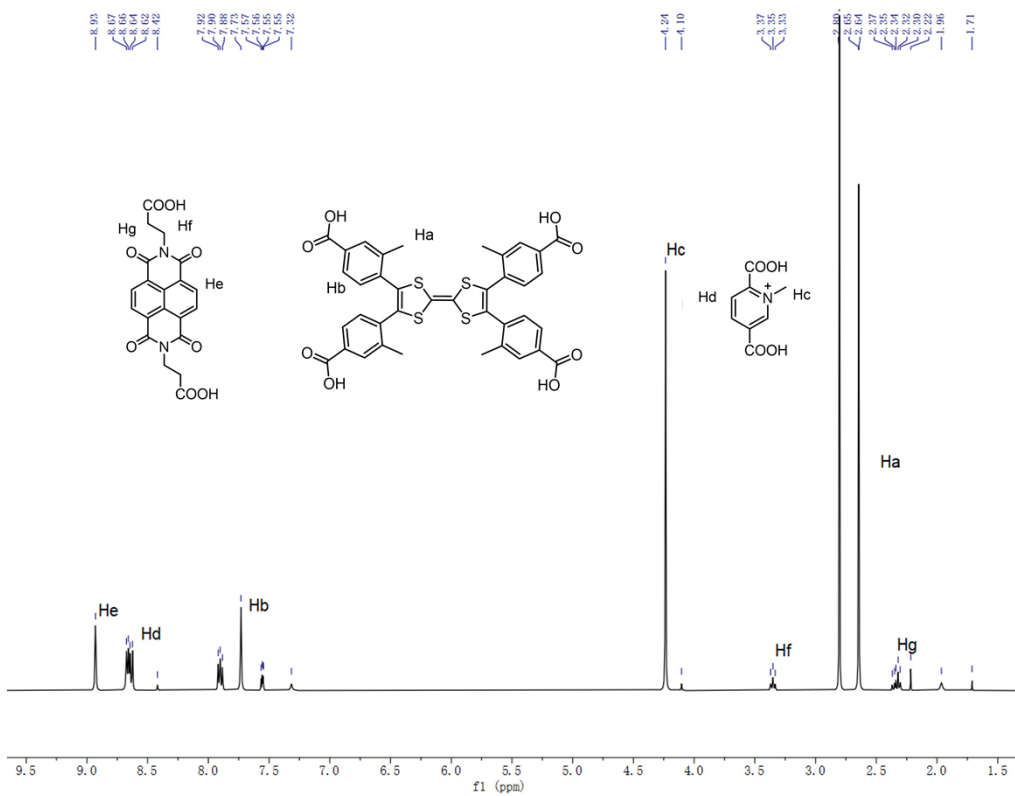

Fig. S4. <sup>1</sup>H-NMR of Zr-TTF-L<sub>1</sub>-L<sub>3</sub>.

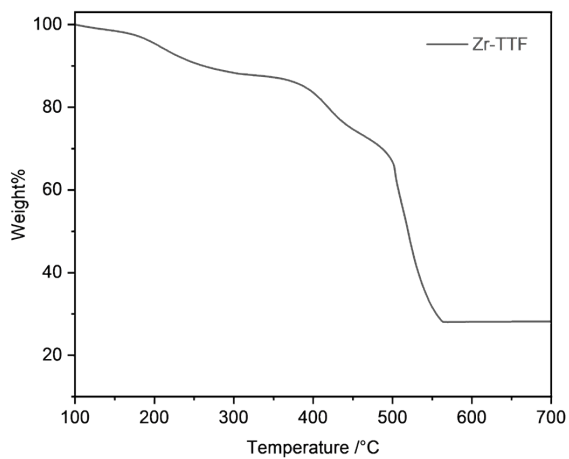

**Fig. S5.** TGA for the Zr-TTF under air.

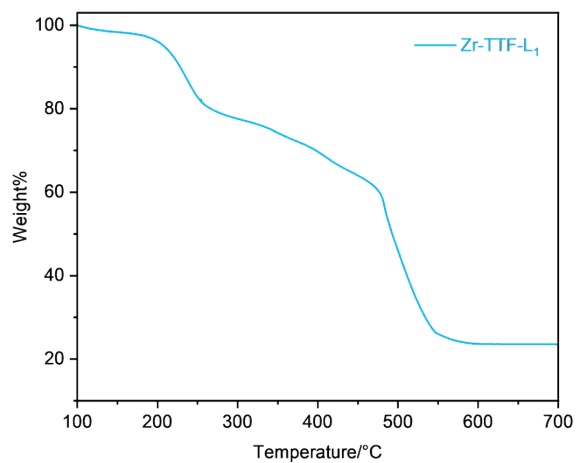

**Fig. S6.** TGA for the Zr-TTF-L<sub>1</sub> under air.

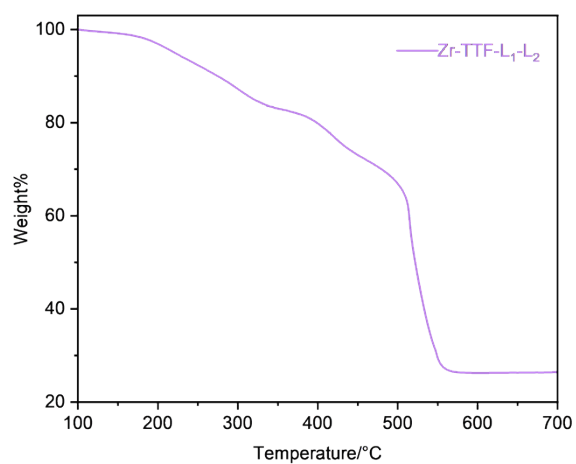

**Fig. S7.** TGA for the Zr-TTF-L<sub>1</sub>-L<sub>2</sub> under air.

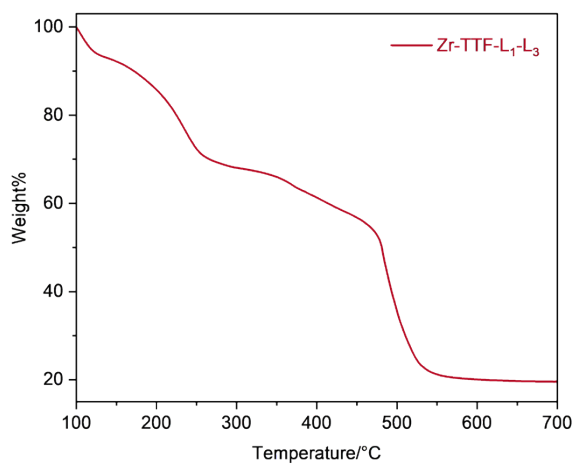

**Fig. S8.** TGA for the Zr-TTF-L<sub>1</sub>-L<sub>3</sub> under air.

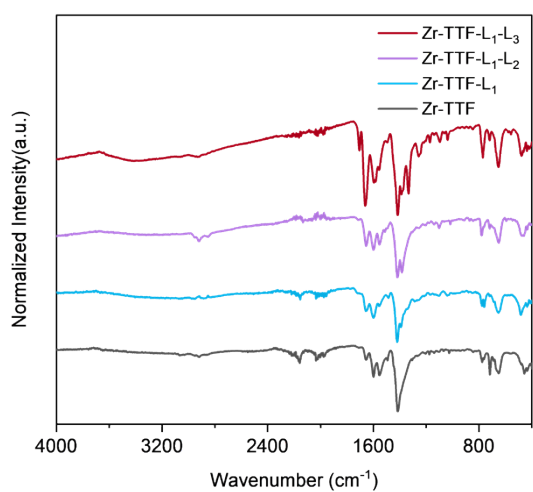

**Fig. S9.** FT-IR of Zr-TTF (gray), Zr-TTF-L<sub>1</sub> (blue), Zr-TTF-L<sub>1</sub>-L<sub>2</sub> (purple), Zr-TTF-L<sub>1</sub>-L<sub>3</sub> (red)

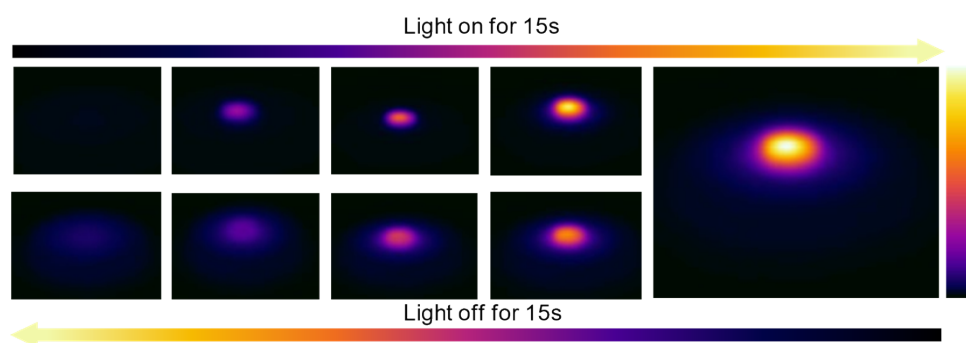

**Fig. S10.** The IR thermal images of a Zr-TTF-L<sub>1</sub>-L<sub>3</sub> pallet under a 0.7 W cm<sup>-2</sup> 808 nm laser.



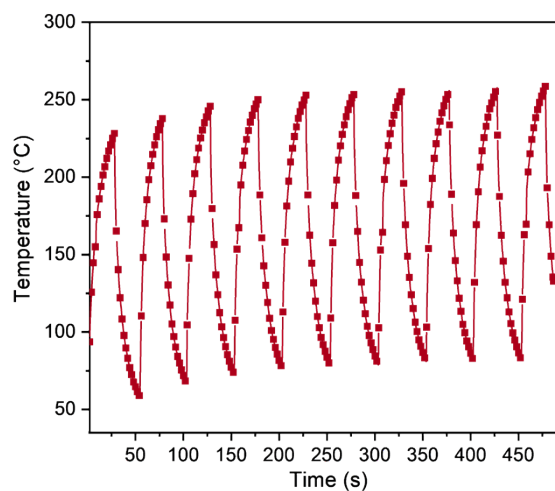

**Fig. S11.** Photostability test of Zr-TTF-L<sub>1</sub>-L<sub>3</sub> during 10 heating/cooling cycles.

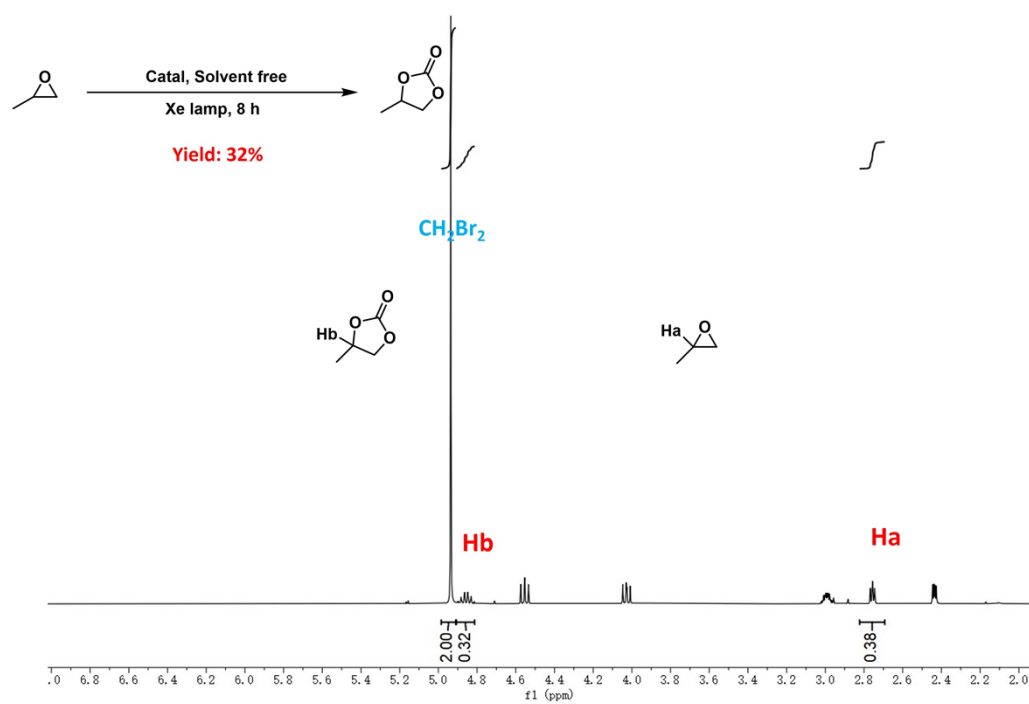

**Fig. S12** <sup>1</sup>H-NMR of the product synthesized by cycloaddition of CO<sub>2</sub> to epoxides (R = Me) catalyzed by Zr-TTF-L<sub>3</sub>.

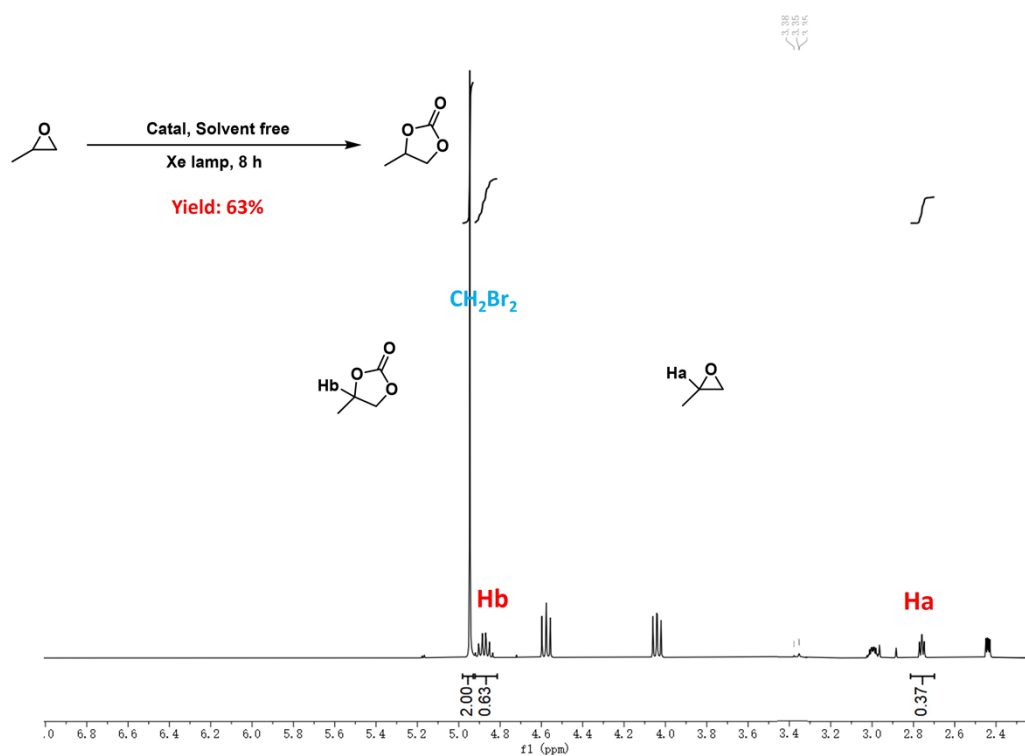

**Fig. S13**  $^1\text{H-NMR}$  of the product synthesized by cycloaddition of  $\text{CO}_2$  to epoxides ( $\text{R} = \text{Me}$ ) catalyzed by  $\text{Zr-TTF-L}_1 + \text{Zr-TTF-L}_3$ .

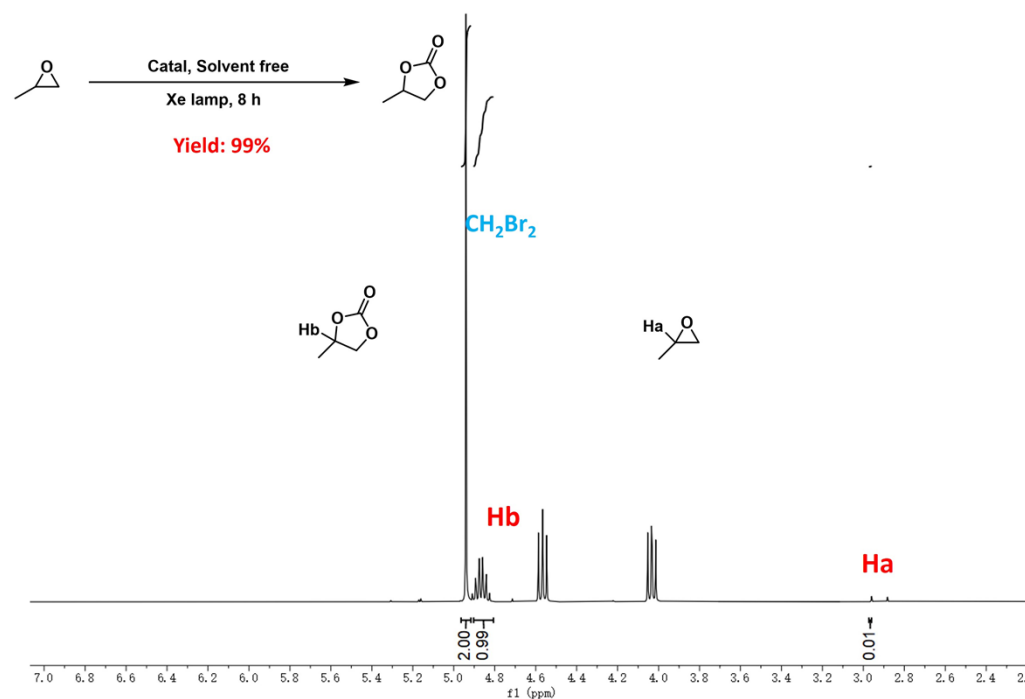

**Fig. S14**  $^1\text{H-NMR}$  of the product synthesized by cycloaddition of  $\text{CO}_2$  to epoxides ( $\text{R} = \text{Me}$ ) catalyzed by  $\text{Zr-TTF-L}_1\text{-L}_3$ .

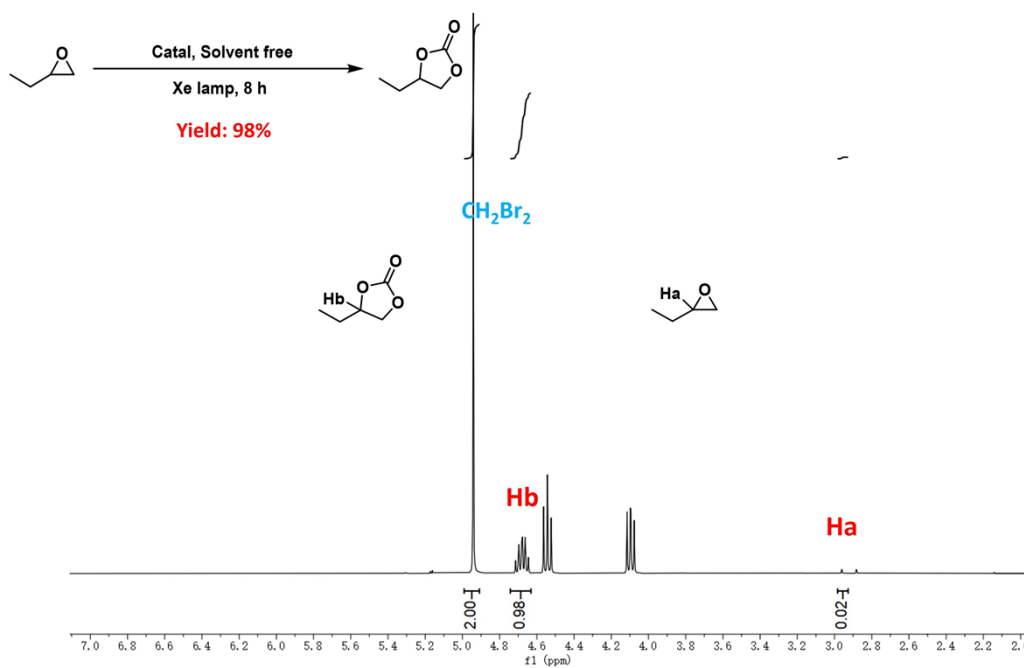

**Fig. S15**  $^1\text{H-NMR}$  of the product synthesized by cycloaddition of  $\text{CO}_2$  to epoxides ( $\text{R} = \text{Et}$ ) catalyzed by  $\text{Zr-TTF-L}_1\text{-L}_3$ .

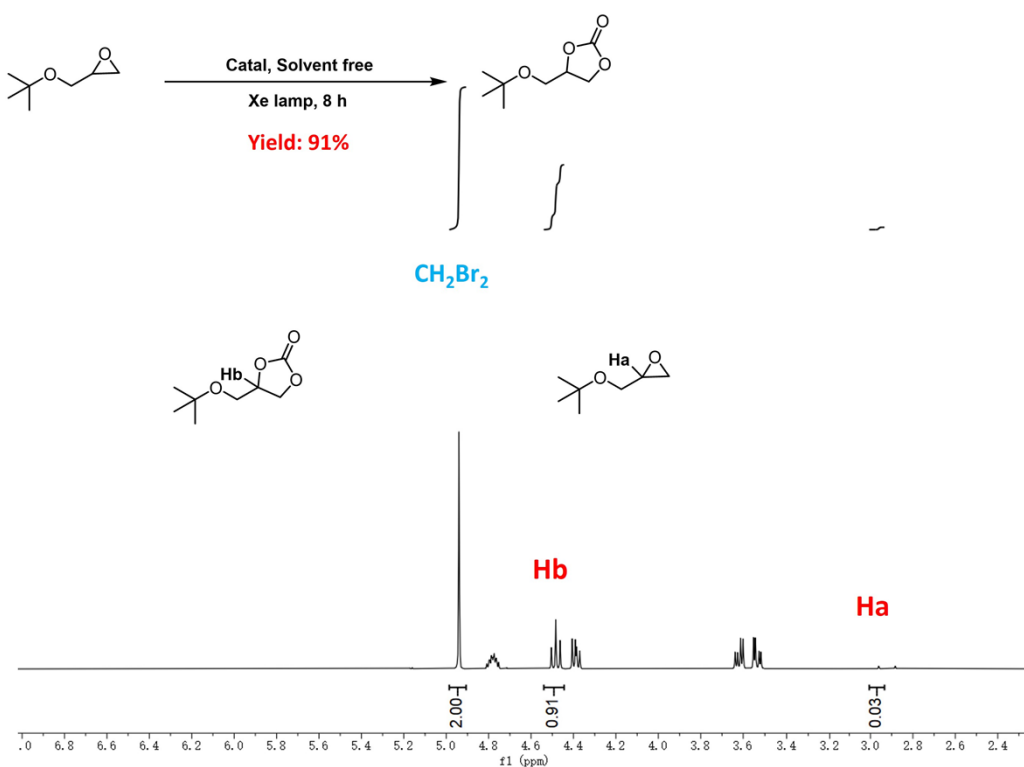

**Fig. S16**  $^1\text{H-NMR}$  of the product synthesized by cycloaddition of  $\text{CO}_2$  to epoxides ( $\text{R} = \text{t-BuO}$ ) catalyzed by  $\text{Zr-TTF-L}_1\text{-L}_3$ .

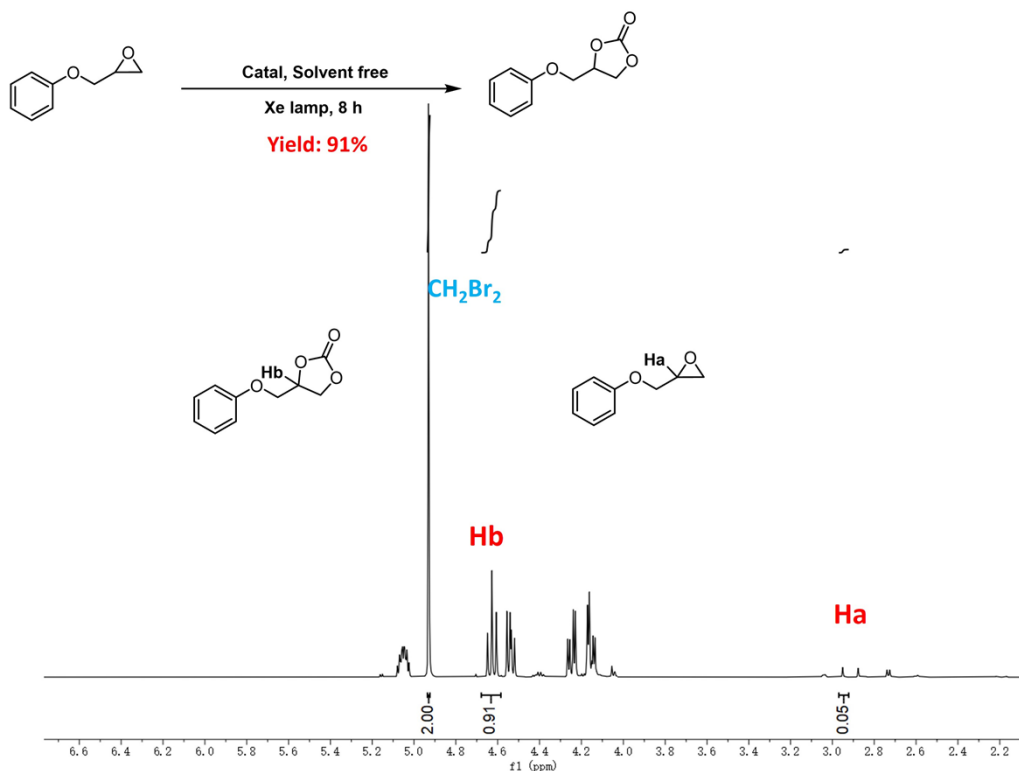

**Fig. S17** <sup>1</sup>H-NMR of the product synthesized by cycloaddition of CO<sub>2</sub> to epoxides (R = PhO) catalyzed by Zr-TTF-L<sub>1</sub>-L<sub>3</sub>.

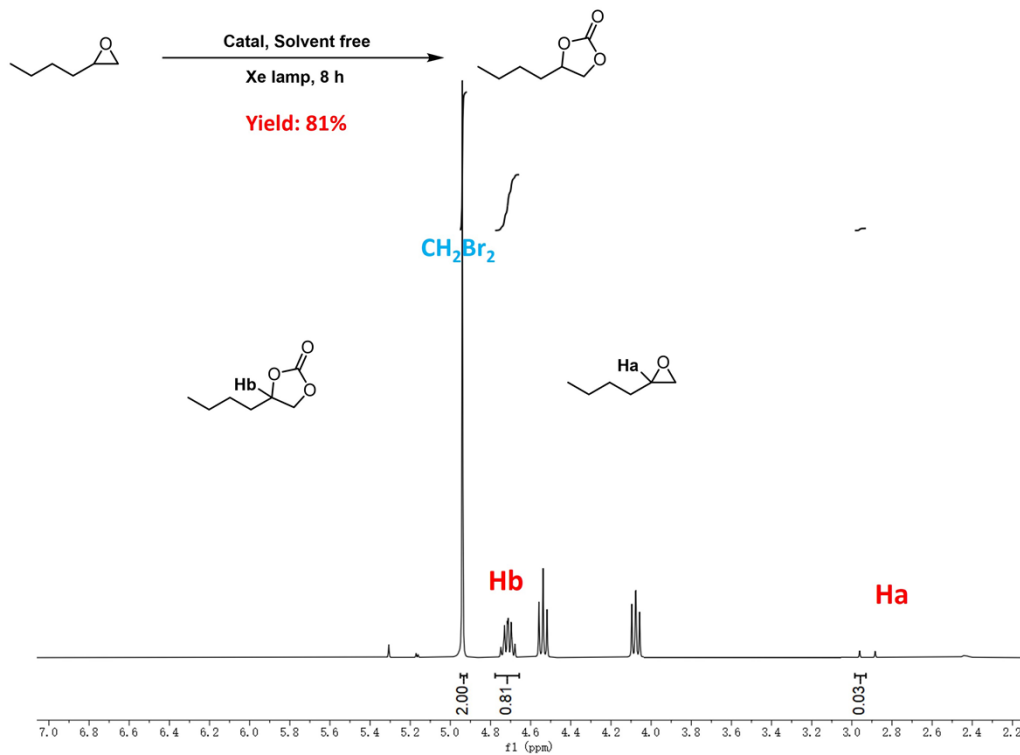

**Fig. S18** <sup>1</sup>H-NMR of the product synthesized by cycloaddition of CO<sub>2</sub> to epoxides (R = Bu) catalyzed by Zr-TTF-L<sub>1</sub>-L<sub>3</sub>.

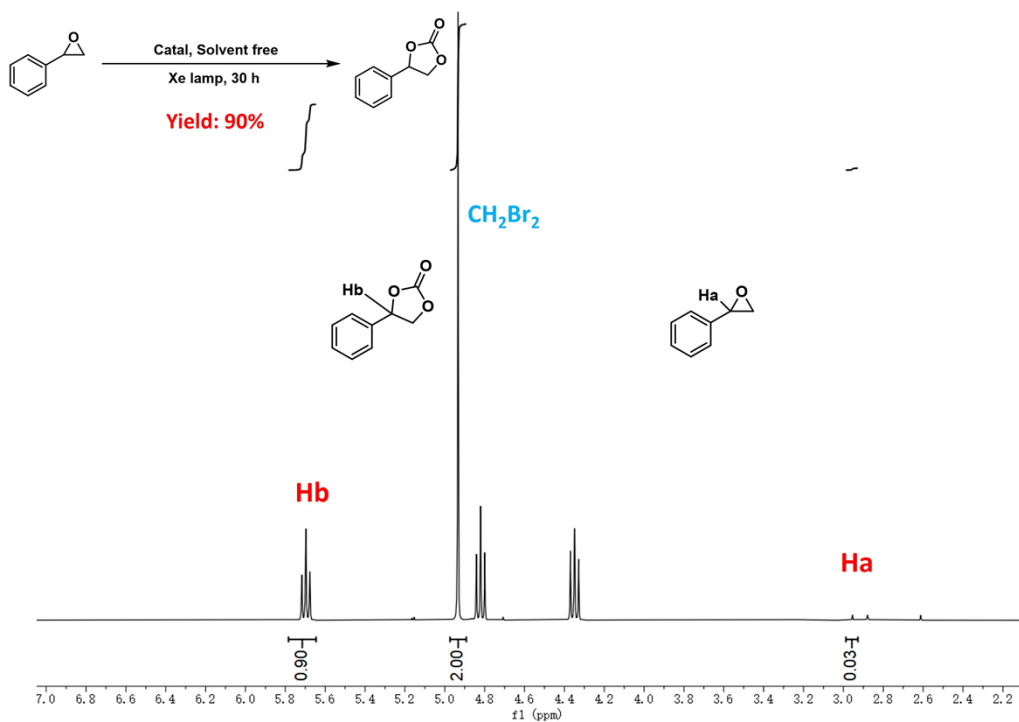

**Fig. S19**  $^1\text{H-NMR}$  of the product synthesized by cycloaddition of  $\text{CO}_2$  to epoxides ( $\text{R} = \text{Ph}$ ) catalyzed by Zr-TTF- $\text{L}_1\text{-L}_3$ .

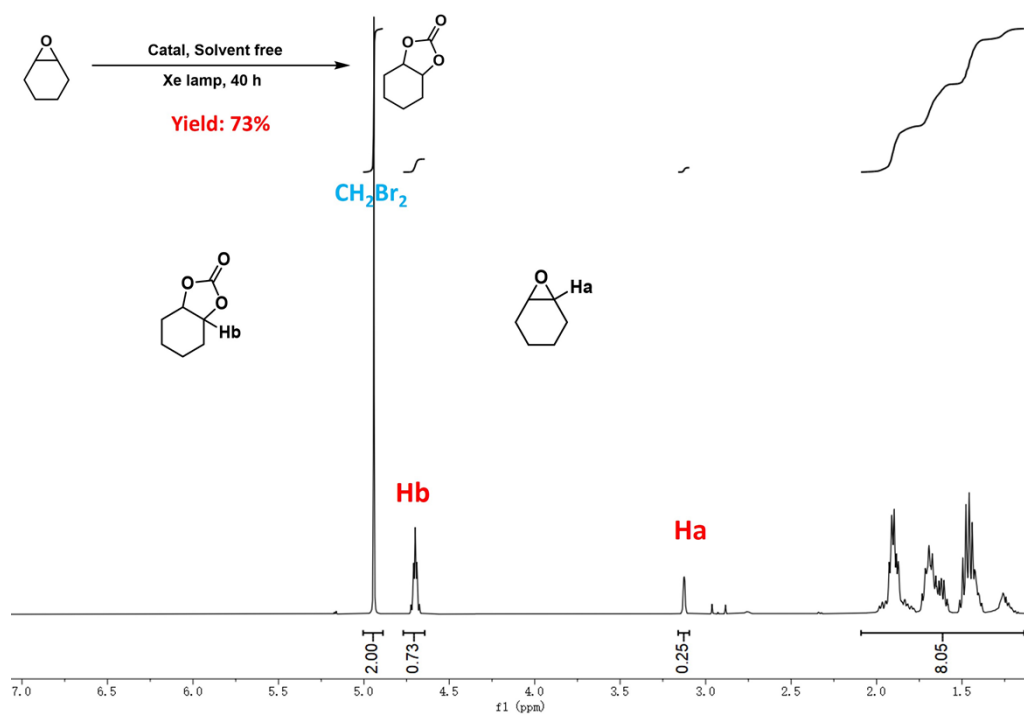

**Fig. S20**  $^1\text{H-NMR}$  of the product synthesized by cycloaddition of  $\text{CO}_2$  to epoxides ( $\text{R} = \text{Cy}$ ) catalyzed by Zr-TTF- $\text{L}_1\text{-L}_3$ .

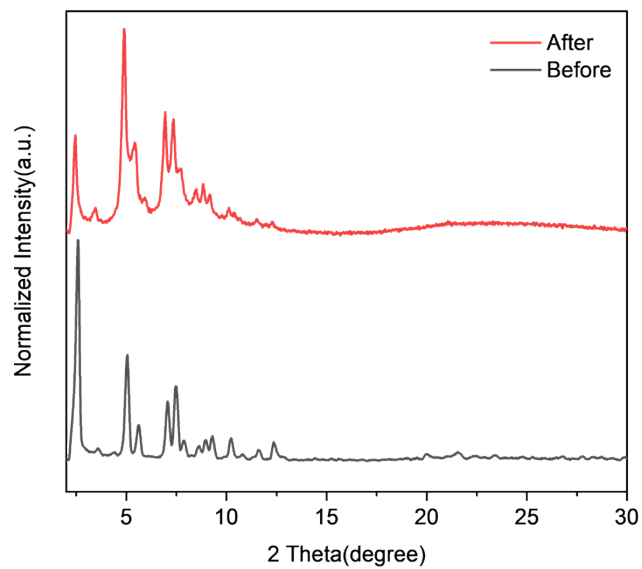

**Fig. S21** PXRD of Zr-TTF-L<sub>1</sub>-L<sub>3</sub> before and after three catalytic cycles.

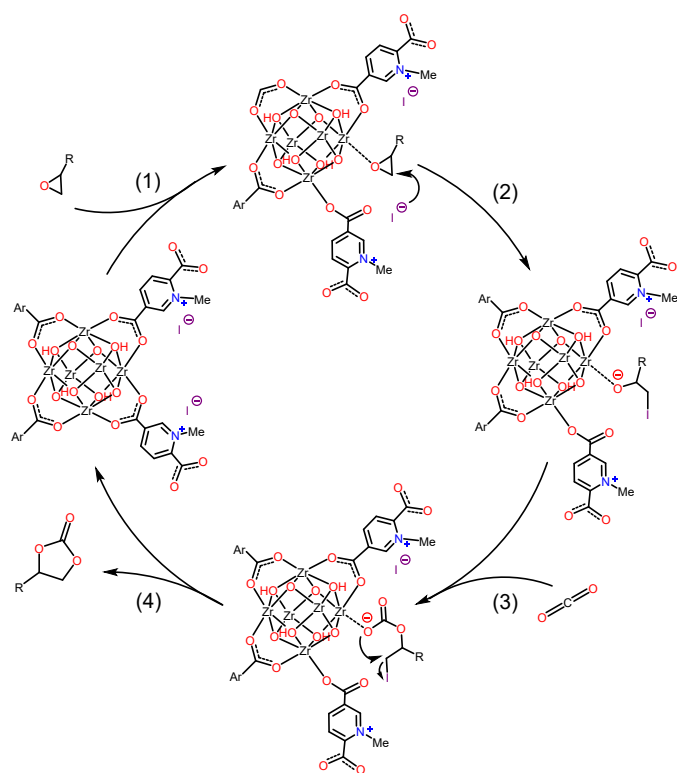

**Fig. S22.** Proposed mechanism of photothermal catalytic cycloaddition reactions of CO<sub>2</sub> with epoxides by MOF catalysts.

**Table S1.** Crystal data and structure refinement.

| Identification code                             | Zr-TTF                                                                         | Zr-TTF-L <sub>1</sub>                                                                                 | Zr-TTF-L <sub>1</sub> -L <sub>2</sub>                                                                  |
|-------------------------------------------------|--------------------------------------------------------------------------------|-------------------------------------------------------------------------------------------------------|--------------------------------------------------------------------------------------------------------|
| CCDC                                            | 1850014                                                                        | 2365200                                                                                               | 2365201                                                                                                |
| Empirical formula                               | C <sub>84</sub> H <sub>48</sub> O <sub>42</sub> S <sub>8</sub> Zr <sub>8</sub> | C <sub>531</sub> H <sub>424</sub> N <sub>6</sub> O <sub>256</sub> S <sub>48</sub><br>Zr <sub>48</sub> | C <sub>726</sub> H <sub>459</sub> N <sub>70</sub> O <sub>256</sub> S <sub>48</sub><br>Zr <sub>48</sub> |
| Formula weight                                  | 2726                                                                           | 16916                                                                                                 | 20183                                                                                                  |
| Temperature / K                                 | 100                                                                            | 100                                                                                                   | 100                                                                                                    |
| Wavelength / Å                                  | 0.71073                                                                        | 1.54184                                                                                               | 1.54184                                                                                                |
| Crystal system                                  | Cubic                                                                          | Cubic                                                                                                 | Cubic                                                                                                  |
| Space group                                     | <i>Pm-3m</i>                                                                   | <i>Pm-3m</i>                                                                                          | <i>Pm-3m</i>                                                                                           |
| a / Å                                           | 36.1380(13)                                                                    | 35.8923(3)                                                                                            | 36.1776(8)                                                                                             |
| b / Å                                           | 36.1380(13)                                                                    | 35.8923(3)                                                                                            | 36.1776(8)                                                                                             |
| c / Å                                           | 36.1380(13)                                                                    | 35.8923(3)                                                                                            | 36.1776(8)                                                                                             |
| α / °                                           | 90                                                                             | 90                                                                                                    | 90                                                                                                     |
| β / °                                           | 90                                                                             | 90                                                                                                    | 90                                                                                                     |
| γ / °                                           | 90                                                                             | 90                                                                                                    | 90                                                                                                     |
| Volume / Å <sup>3</sup>                         | 47195(5)                                                                       | 46238.5(7)                                                                                            | 47350(3)                                                                                               |
| Z                                               | 6                                                                              | 1                                                                                                     | 1                                                                                                      |
| Density (calculated) / Mg/m <sup>3</sup>        | 0.576                                                                          | 0.607                                                                                                 | 0.708                                                                                                  |
| Absorption coefficient / mm <sup>-1</sup>       | 0.336                                                                          | 2.898                                                                                                 | 2.890                                                                                                  |
| F(000)                                          | 8048                                                                           | 8395                                                                                                  | 10045                                                                                                  |
| Theta range for data collection / °             | 0.976 to 24.702                                                                | 2.753 to 64.949°                                                                                      | 2.115 to 64.599°                                                                                       |
| Index ranges                                    | -42 ≤ h ≤ 42, -37 ≤ k ≤ 42,<br>-42 ≤ l ≤ 42                                    | -41 ≤ h ≤ 15, -41 ≤ k ≤ 41,<br>-25 ≤ l ≤ 24                                                           | -34 ≤ h ≤ 38, -38 ≤ k ≤ 36,<br>-39 ≤ l ≤ 42                                                            |
| Reflections collected                           | 89363                                                                          | 90003                                                                                                 | 210642                                                                                                 |
| Independent reflections                         | 7534 [R(int) = 0.0718]                                                         | 7311 [R(int) = 0.1612]                                                                                | 7481 [R(int) = 0.0982]                                                                                 |
| Completeness to theta                           | 99.2% (24.702°)                                                                | 98.6% (64.949°)                                                                                       | 99.3% (64.599°)                                                                                        |
| Max. and min. transmission                      | 0.904 and 0.889                                                                | 0.7525 and 0.5774                                                                                     | 0.7525 and 0.6176                                                                                      |
| Refinement method                               | Full-matrix least-squares on F <sup>2</sup>                                    | Full-matrix least-squares on F <sup>2</sup>                                                           | Full-matrix least-squares on F <sup>2</sup>                                                            |
| Data / restraints / parameters                  | 7534 / 619 / 203                                                               | 7311 / 354 / 257                                                                                      | 7481 / 463 / 326                                                                                       |
| Goodness-of-fit on F <sup>2</sup>               | 1.156                                                                          | 0.986                                                                                                 | 1.079                                                                                                  |
| Final R indices [I > 2σ(I)]                     | R <sub>1</sub> = 0.0706, wR <sub>2</sub> = 0.2204                              | R <sub>1</sub> = 0.0868, wR <sub>2</sub> = 0.2449                                                     | R <sub>1</sub> = 0.0613, wR <sub>2</sub> = 0.1954                                                      |
| R indices (all data)                            | R <sub>1</sub> = 0.0769, wR <sub>2</sub> = 0.2276                              | R <sub>1</sub> = 0.1448, wR <sub>2</sub> = 0.2853                                                     | R <sub>1</sub> = 0.0755, wR <sub>2</sub> = 0.2037                                                      |
| Largest diff. peak and hole / e.Å <sup>-3</sup> | 0.841 and -1.071                                                               | 0.812 and -0.722                                                                                      | 0.645 and -0.870                                                                                       |

**Table S2.** Photothermal catalytic cycloaddition reactions of CO<sub>2</sub> with epoxides by MOF catalysts.<sup>a</sup>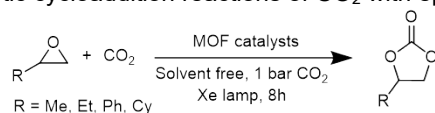

| Entry | R                 | Catalyst                                         | Conditions  | Yield (%) <sup>[a]</sup> | TON <sup>[b]</sup> | TOF (h <sup>-1</sup> ) <sup>[c]</sup> |
|-------|-------------------|--------------------------------------------------|-------------|--------------------------|--------------------|---------------------------------------|
| 1     | Me                | -                                                | Light, 20°C | 2                        | -                  | -                                     |
| 2     | Me                | Zr-TTF                                           | Light, 20°C | 28                       | 24.4               | 3.05                                  |
| 3     | Me                | Zr-TTF-L <sub>1</sub>                            | Light, 20°C | 45                       | 39.2               | 4.90                                  |
| 4     | Me                | Zr-TTF-L <sub>3</sub>                            | Light, 20°C | 32                       | 27.8               | 3.48                                  |
| 5     | Me                | Zr-TTF-L <sub>1</sub> +<br>Zr-TTF-L <sub>3</sub> | Light, 20°C | 63                       | 54.8               | 6.85                                  |
| 6     | Me                | Zr-TTF-L <sub>1</sub> -L <sub>3</sub>            | Dark, 20°C  | 18                       | 15.7               | 1.96                                  |
| 7     | Me                | Zr-TTF-L <sub>1</sub> -L <sub>3</sub>            | Light, 20°C | 99                       | 86.1               | 10.9                                  |
| 8     | Me                | Zr-TTF-L <sub>1</sub> -L <sub>3</sub>            | Dark, 55°C  | 64                       | 55.7               | 6.96                                  |
| 9     | Et                | Zr-TTF-L <sub>1</sub> -L <sub>3</sub>            | Light, 20°C | 98                       | 85.8               | 10.7                                  |
| 10    | t-BuO             | Zr-TTF-L <sub>1</sub> -L <sub>3</sub>            | Light, 20°C | 91                       | 79.1               | 9.89                                  |
| 11    | PhO               | Zr-TTF-L <sub>1</sub> -L <sub>3</sub>            | Light, 20°C | 91                       | 79.1               | 9.89                                  |
| 12    | Bu                | Zr-TTF-L <sub>1</sub> -L <sub>3</sub>            | Light, 20°C | 81                       | 70.2               | 8.78                                  |
| 13    | Ph <sup>[d]</sup> | Zr-TTF-L <sub>1</sub> -L <sub>3</sub>            | Light, 20°C | 90                       | 78.3               | 2.61                                  |
| 14    | Cy <sup>[e]</sup> | Zr-TTF-L <sub>1</sub> -L <sub>3</sub>            | Light, 20°C | 73                       | 63.5               | 1.59                                  |

<sup>[a]</sup> Reaction condition: epoxides (2 mmol), MOF catalysts (0.023 mmol based on Zr), 360 mW·cm<sup>-2</sup>, 8 h, 1 bar CO<sub>2</sub>. Cyclic carbonate yield was calculated from the <sup>1</sup>H-NMR spectra using mesitylene as the internal standard (Fig. S12-20).

<sup>[b]</sup> Turnover number: product (mmol) / Zr (mmol).

<sup>[c]</sup> Turnover frequency: product (mmol) / Zr (mmol) / time (h).

<sup>[d]</sup> Reaction time is 30 h.

<sup>[e]</sup> Cyclohexene oxide as the reactant, reaction time is 40 h.



## References

1. Su, J.; Yuan, S.; Wang, T.; Lollar, C. T.; Zuo, J.-L.; Zhang, J.; Zhou, H.-C. Zirconium Metal–Organic Frameworks Incorporating Tetrathiafulvalene Linkers: Robust and Redox-Active Matrices for in Situ Confinement of Metal Nanoparticles. *Chem. Sci.* 2020, 11 (7), 1918–1925.
